# Supplementary material for: Management of New Hyperglycemia in Patients Prescribed Antipsychotics
Source: Atypon-hosted journal article supplement (doi:10.1176/appi.ps.201300514), 2014-12-01
Supplement: appi.ps.201300514.ds001.pdf [file appi.ps.201300514.ds001.pdf]

Appendix Figure 1. Patient Selection Flow Chart

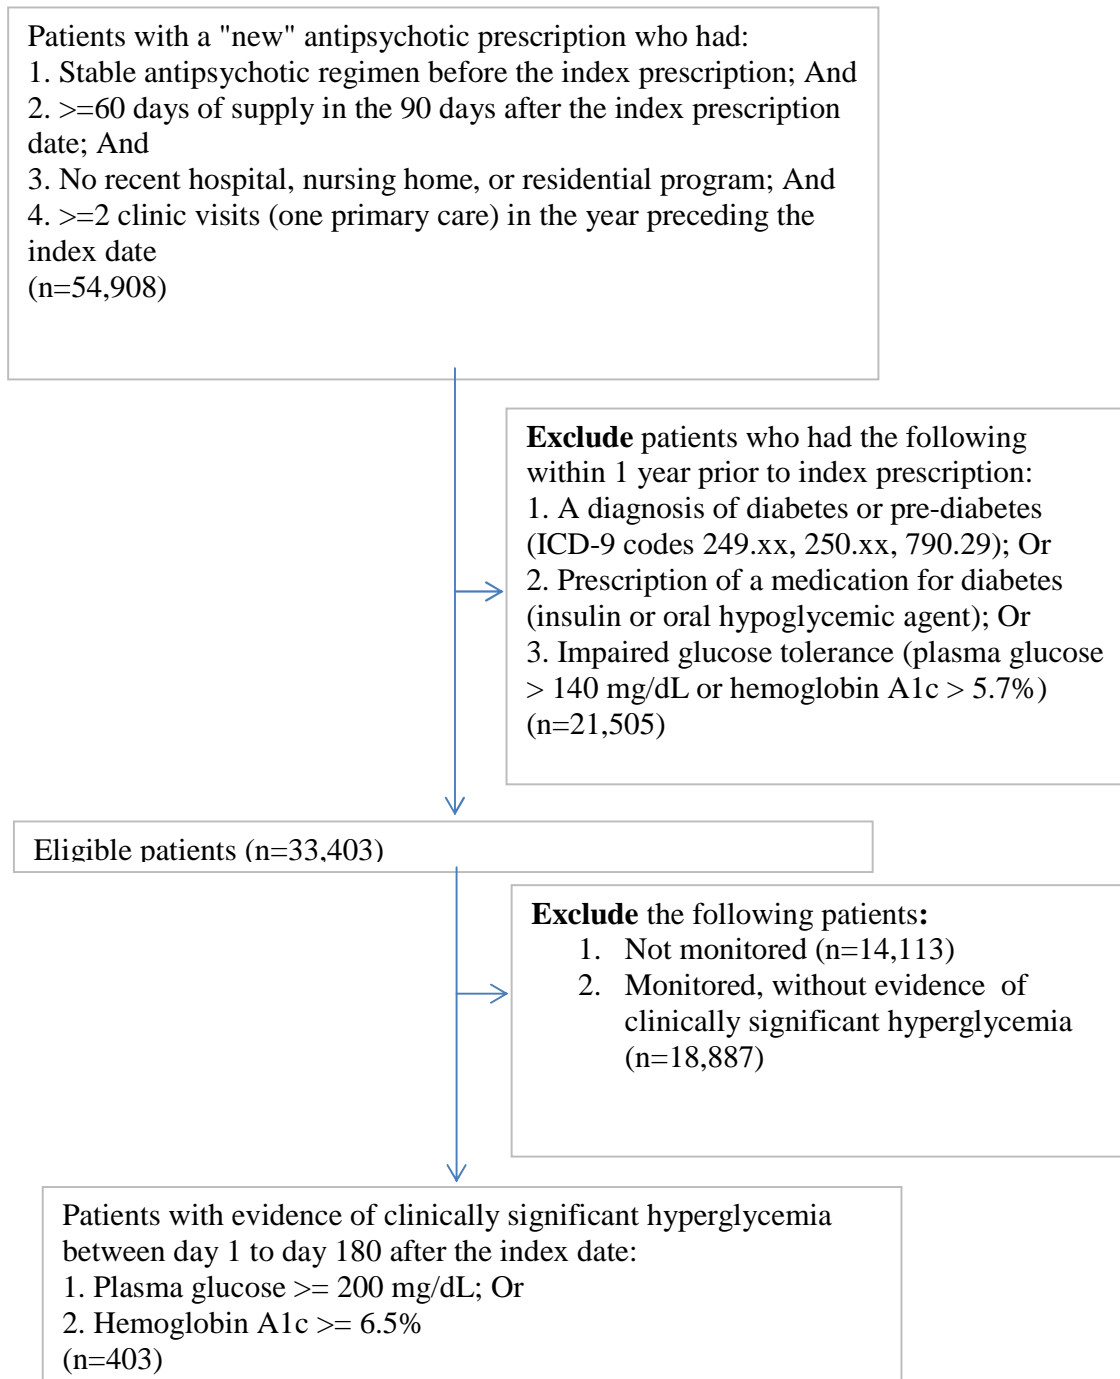

**Appendix Figure 2. Management actions within 30 days and within 60 days after the first abnormal glucose/HbA1c test in 180-day post index period (N=403)**

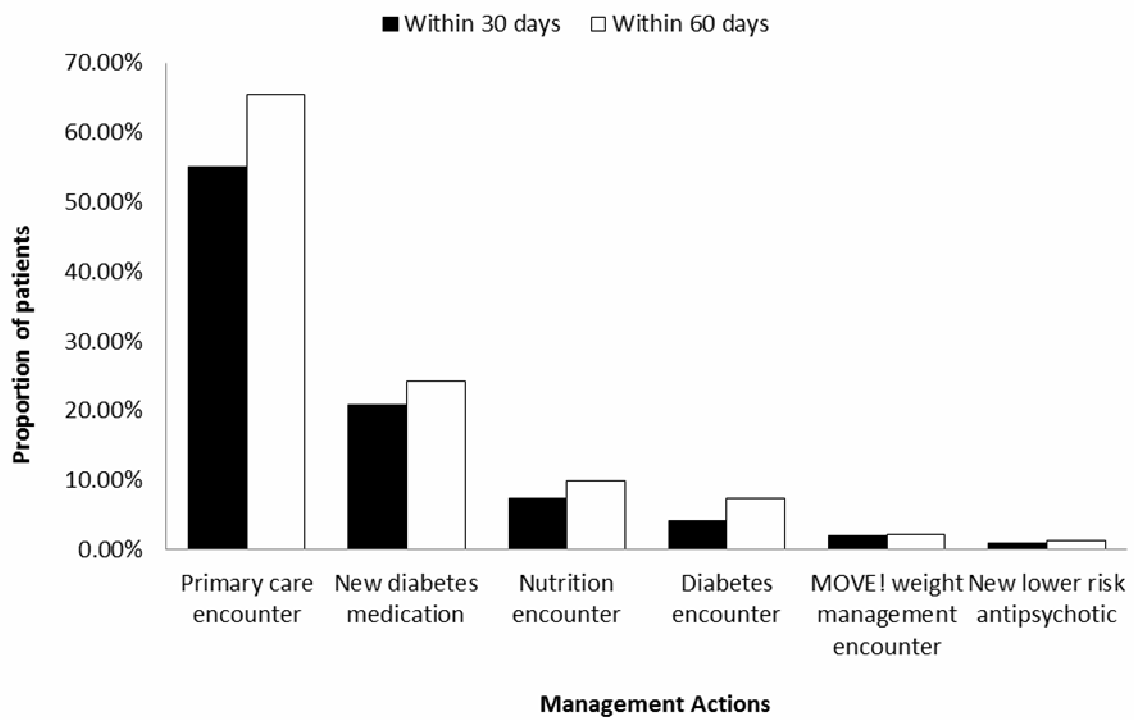

Appendix Table 1. Patient Characteristics by Management Status

|                                                         | Full Sample<br>(N=403) |    | By Management<br>Status |    |                    |    | P*   |
|---------------------------------------------------------|------------------------|----|-------------------------|----|--------------------|----|------|
|                                                         | N                      | %  | Not Managed<br>(N=149)  |    | Managed<br>(N=254) |    |      |
| N                                                       |                        |    | %                       | N  | %                  | N  | %    |
| Age (M±SD)                                              | 57.7±12.8              |    | 60.07±13.79             |    | 56.33±12.03        |    | .005 |
| Age Group                                               |                        |    |                         |    |                    |    | .022 |
| Under 45                                                | 46                     | 11 | 16                      | 11 | 30                 | 12 |      |
| 45-54                                                   | 111                    | 28 | 30                      | 20 | 81                 | 32 |      |
| 55-64                                                   | 161                    | 40 | 62                      | 42 | 99                 | 39 |      |
| 65 or above                                             | 85                     | 21 | 41                      | 28 | 44                 | 17 |      |
| Race                                                    |                        |    |                         |    |                    |    | .905 |
| White                                                   | 268                    | 67 | 99                      | 66 | 169                | 67 |      |
| Other                                                   | 135                    | 33 | 50                      | 34 | 85                 | 33 |      |
| Gender                                                  |                        |    |                         |    |                    |    | .065 |
| Male                                                    | 378                    | 94 | 136                     | 91 | 242                | 95 |      |
| Female                                                  | 25                     | 6  | 13                      | 9  | 12                 | 5  |      |
| Married                                                 |                        |    |                         |    |                    |    | .833 |
| Yes                                                     | 164                    | 41 | 59                      | 40 | 105                | 41 |      |
| No                                                      | 239                    | 59 | 90                      | 60 | 149                | 59 |      |
| Psychiatric Condition (-360 to<br>+180days)             |                        |    |                         |    |                    |    | .760 |
| Schizophrenia                                           | 68                     | 17 | 27                      | 18 | 41                 | 16 |      |
| Bipolar                                                 | 78                     | 19 | 25                      | 17 | 53                 | 21 |      |
| Other psychosis                                         | 49                     | 12 | 17                      | 11 | 32                 | 13 |      |
| Other psychiatric<br>conditions                         | 203                    | 50 | 79                      | 53 | 124                | 49 |      |
| No psychiatric<br>conditions                            | 5                      | 1  | 1                       | 1  | 4                  | 2  |      |
| Pre-existing comorbidities (-360 days to<br>Index date) |                        |    |                         |    |                    |    |      |
| Obesity                                                 | 168                    | 42 | 55                      | 37 | 113                | 44 | .137 |
| Dyslipidemia                                            | 192                    | 48 | 60                      | 40 | 132                | 52 | .023 |
| Hypertension                                            | 202                    | 50 | 65                      | 44 | 137                | 54 | .062 |
| Heart disease                                           | 42                     | 10 | 10                      | 7  | 32                 | 13 | .062 |
| Metabolic risk of index antipsychotic<br>agent          |                        |    |                         |    |                    |    | .192 |
| High                                                    | 32                     | 8  | 14                      | 9  | 18                 | 7  |      |
| Medium                                                  | 275                    | 68 | 106                     | 71 | 169                | 67 |      |

Low

96

24

29

19

67

26

---
